# Supplementary material for: Innovative Low-Cost Composite Nanoadsorbents Based on Eggshell Waste for Nickel Removal from Aqueous Media
Source: MDPI journal article supplement (doi:10.3390/nano13182572), 2023-09-16
Supplement: s1 [file s1]

## SUPPLEMENTARY INFORMATION

### **Innovative Low-Cost Composite Nanoadsorbents Based on Eggshell Waste for Nickel Removal from Aqueous Media**

Adina-Elena Segneanu<sup>1</sup>, Roxana Trusca<sup>2</sup>, Claudiu Cepan<sup>3</sup>, Maria Mihailescu<sup>3,4</sup>, Cornelia Muntean<sup>3,4</sup>, Daniel Dumitru Herea<sup>5</sup>, Ioan Grozescu<sup>3</sup> and Athanasios Salifoglou<sup>6</sup>✉

1 Institute for Advanced Environmental Research, West University of Timisoara (ICAM-WUT), 4 Oituz St., 300086 Timișoara, Romania

2 National Center for Micro and Nanomaterials, Politehnica University of Bucharest, Str. Splaiul Independenței, Nr. 313, 060042 Bucharest, Romania

3 Department of Applied Chemistry and Engineering of Inorganic Compounds and the Environment, University Politehnica Timisoara, Piata Victoriei Nr. 2, 300006 Timisoara, Romania  
4 Research Institute for Renewable Energy, 138 Gavril Musicescu St., 300501 Timisoara, Romania

5 National Institute of Research and Development for Technical Physics, 47 Mangeron Blvd, 700050 Iasi, Romania

6 Laboratory of Inorganic Chemistry and Advanced Materials, School of Chemical Engineering, Aristotle University of Thessaloniki, 54124 Thessaloniki, Greece

✉ Author to whom correspondence should be addressed

Author E-mail addresses: adina.segneanu@e-uvt.ro; truscaroxana@yahoo.com, cepanclaudiu@gmail.com; mihailescumia@gmail.com; cornelia.muntean@upt.ro; dherea@phys-iasi.ro; ioangrozescu@gmail.com; salif@auth.gr.

## FIGURES

**Figure S1:** Nitrogen adsorption-desorption isotherms for FEZ adsorbent, EZ, eggshell, and zeolite.

**Figure S2:** FT- IR spectra of zeolite (A), eggshell (B), EZ (C), and FEZ (D).

**Figure S3:** EDX spectra of zeolite (A), and eggshell (B).

**Figure S4:** SEM Live map (1) and EDX spectra showing the distribution of elements (2) in EZ (A), and FEZ (B).

**Figure S5:** XRD patterns of zeolite (A), eggshell (B), EZ (C), and FEZ (D).

**Figure S6:** Plot of the experimental data using the linearized form of (A) Langmuir model, and (B) Freundlich model.

**Figure S7:** Van't Hoff plot for nickel adsorption on FEZ and EZ.

**Figure S8:** (A) Pseudo-first-order model fitting diagram, (B) Pseudo-second-order model fitting diagram, and (C) Intraparticle diffusion model fitting diagram.

**Figure S9:** FT-IR spectra of EZ (A) after adsorption, and (B) before and after adsorption.

**Figure S10:** FT-IR spectra of FEZ (A) after adsorption, and (B) before and after adsorption.

**Figure S11:** SEM micrographs of EZ (A, 30  $\mu\text{m}$ ; C, 50  $\mu\text{m}$ ) before adsorption, and (B, 30  $\mu\text{m}$ ; D, 50  $\mu\text{m}$ ) after adsorption.

**Figure S12:** SEM micrographs of FEZ (A, 30  $\mu\text{m}$ ; C, 50  $\mu\text{m}$ ) before adsorption, and (B, 30  $\mu\text{m}$ ; D-E, 50  $\mu\text{m}$ ) after adsorption.

**Figure S13:** Live maps of EZ (A), and FEZ (B) after adsorption.

**Figure S14:** EDX spectrum of EZ (A), and FEZ (B) after adsorption.

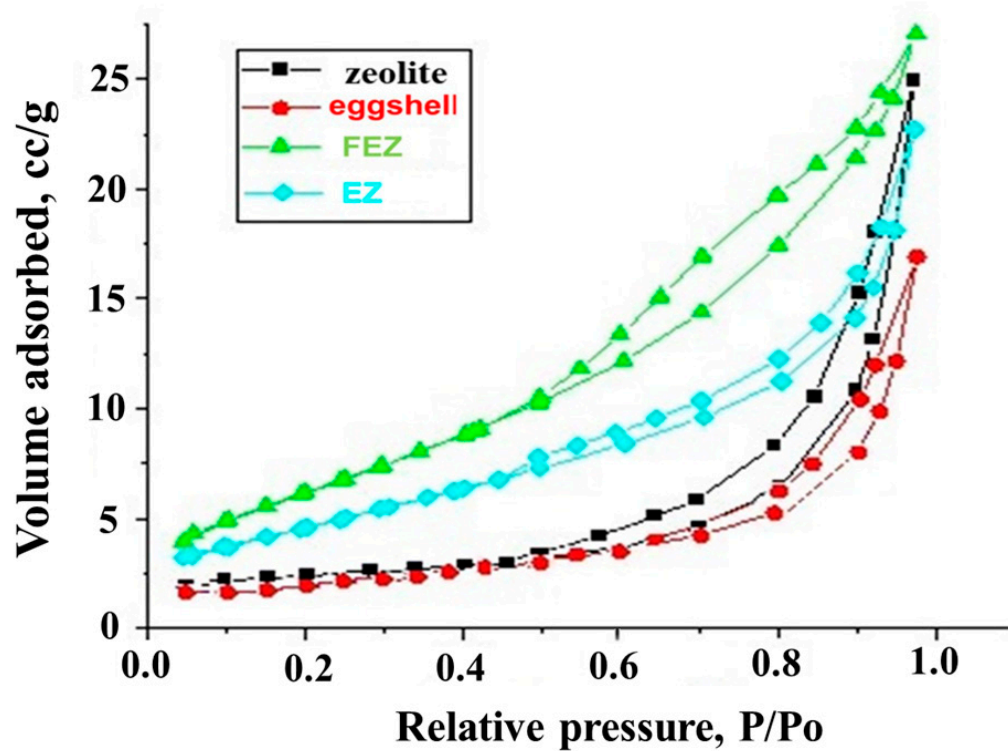

Figure S1

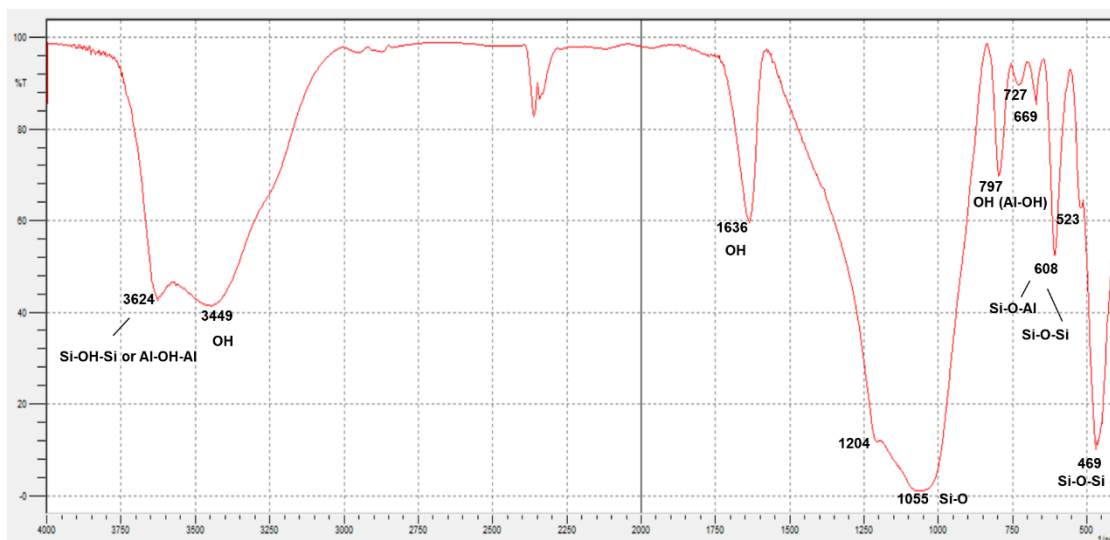

**Figure S2A**

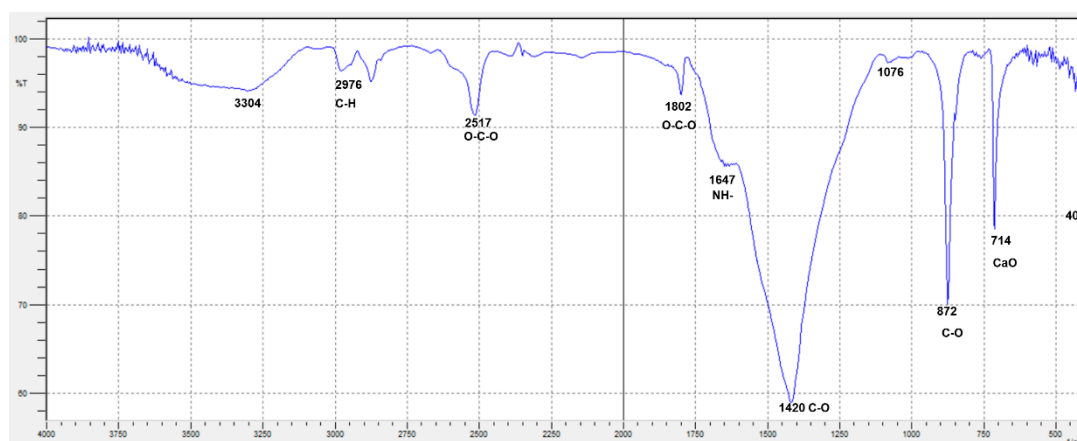

**Figure S2B**

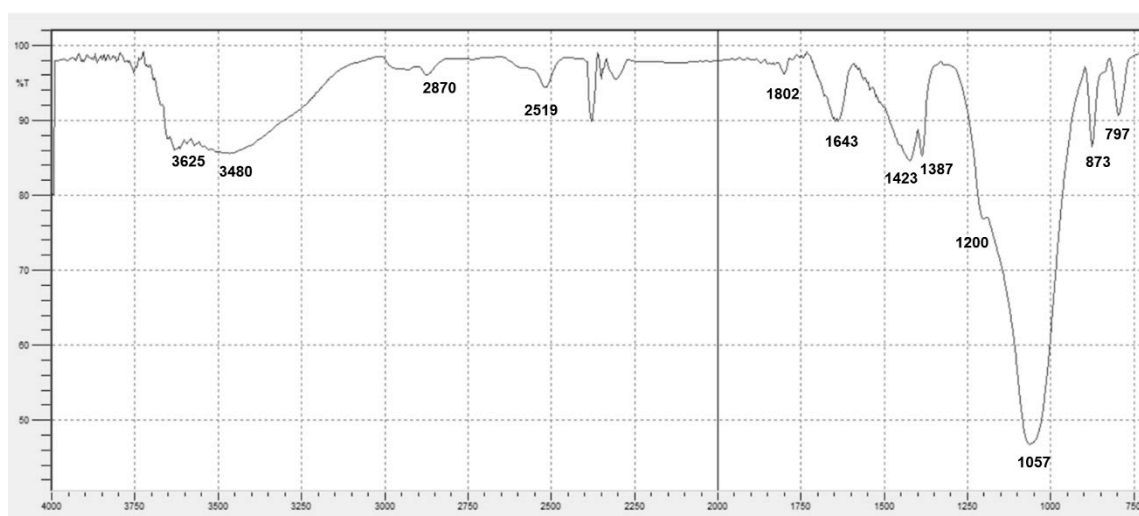

**Figure S2C**



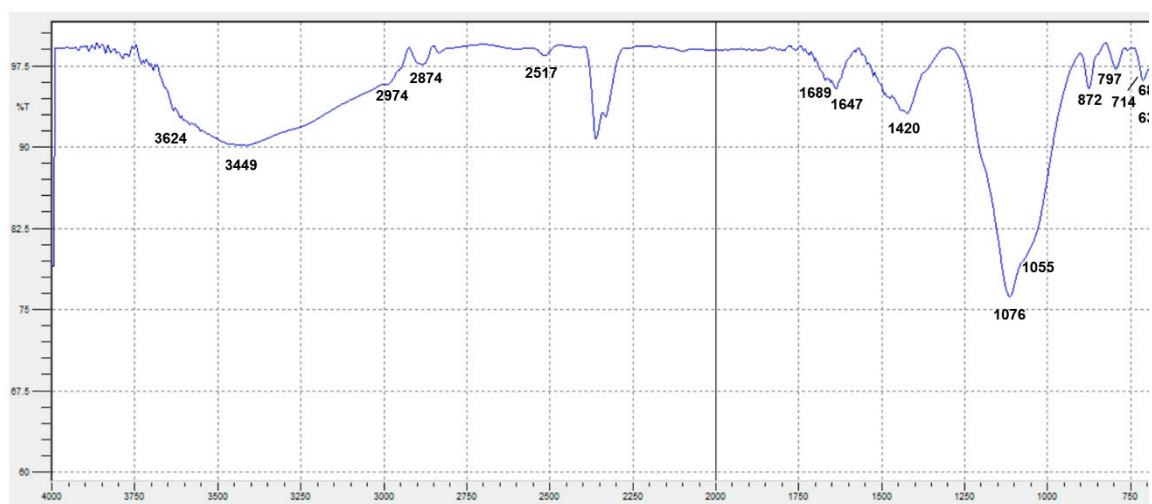

**Figure S2D**

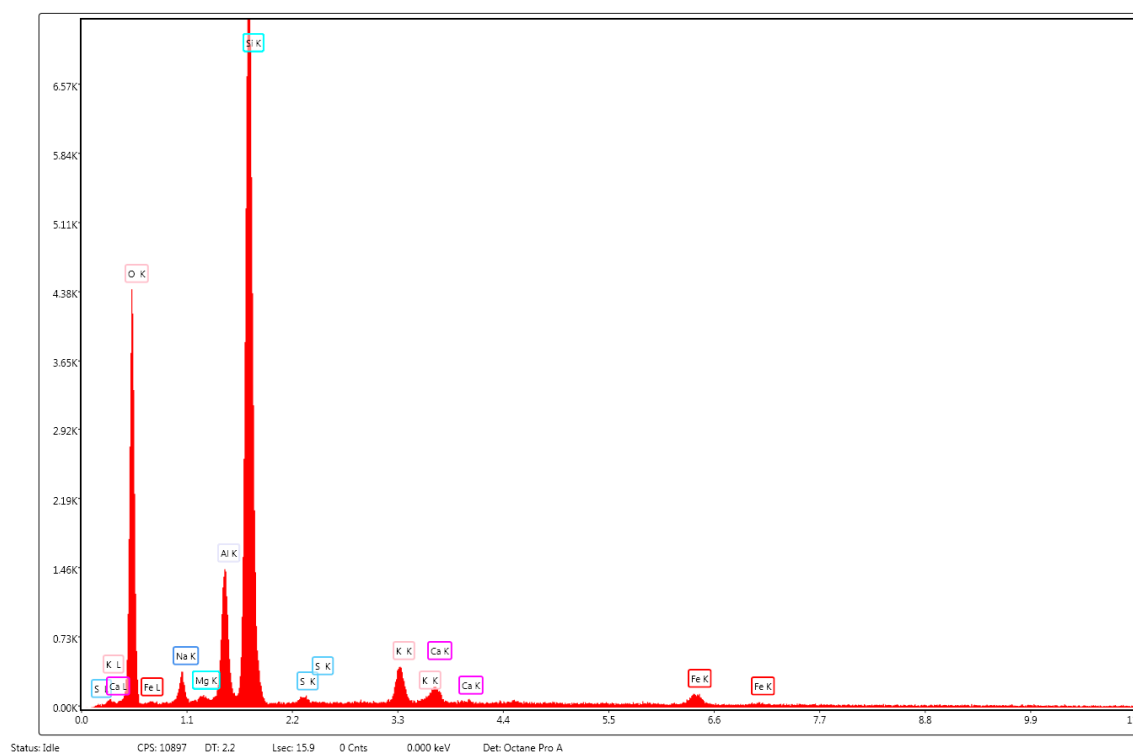**Figure S3A**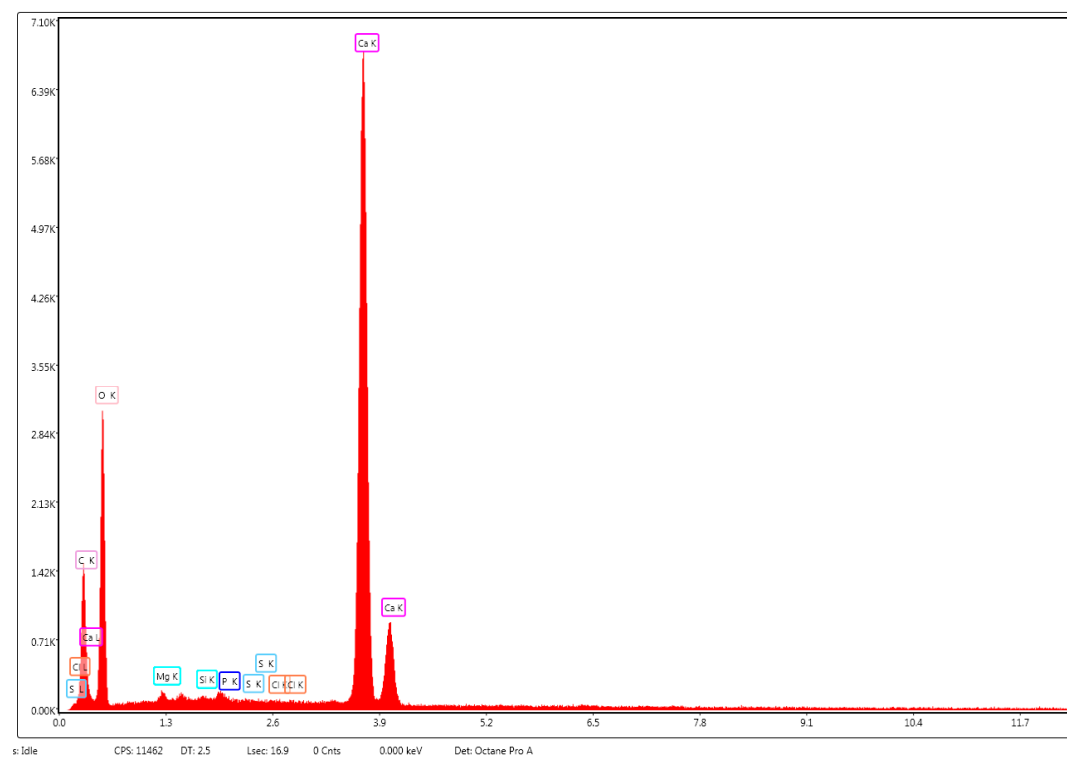**Figure S3B**

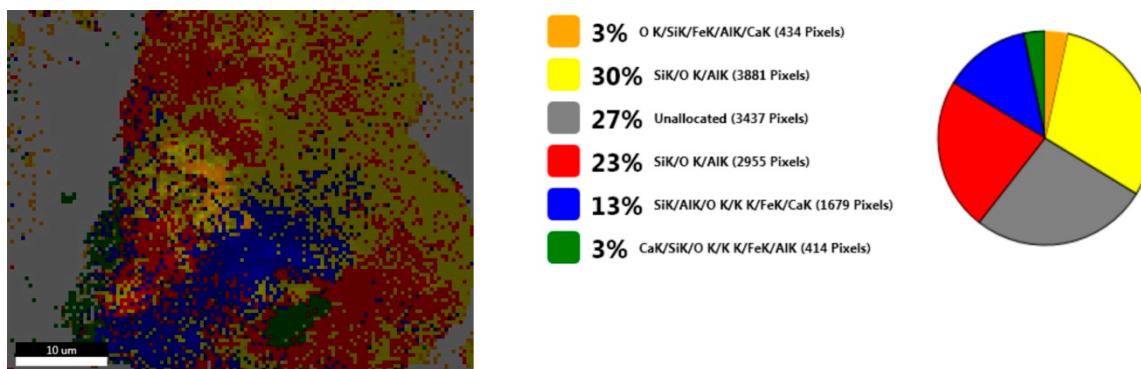

**Figure S4A(1)**

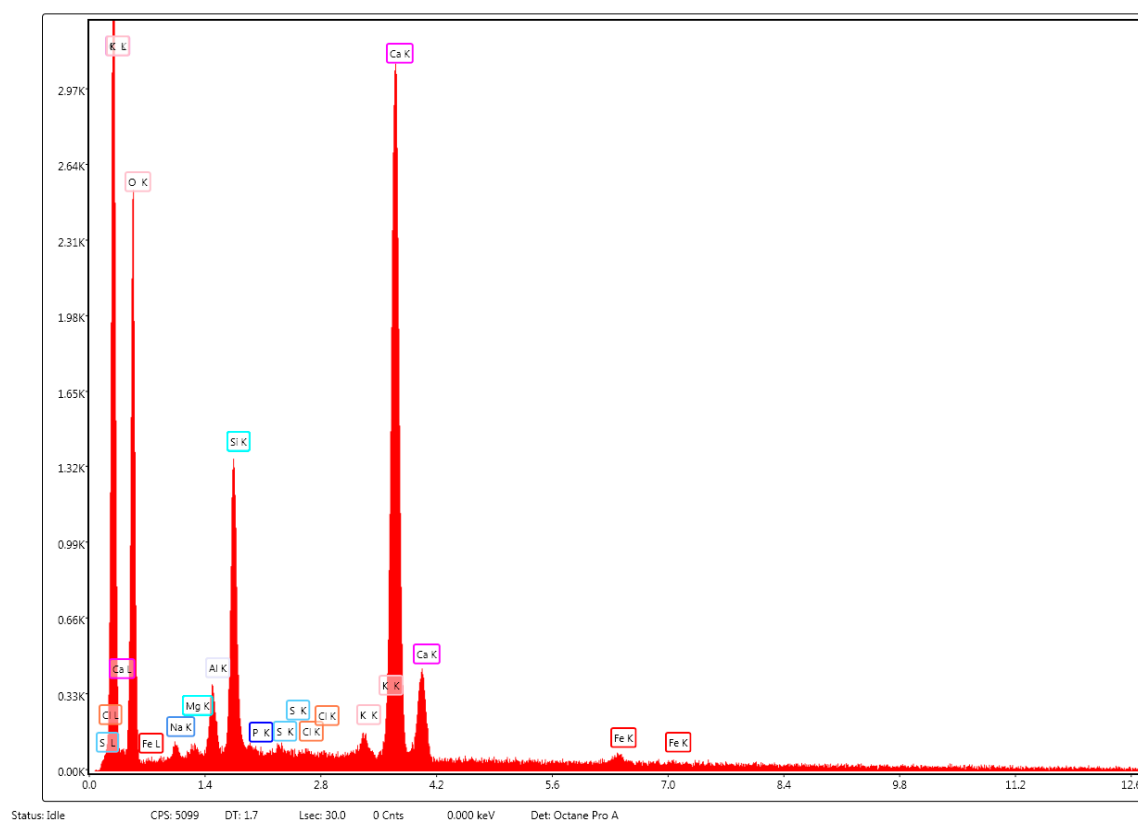

**Figure S4A(2)**

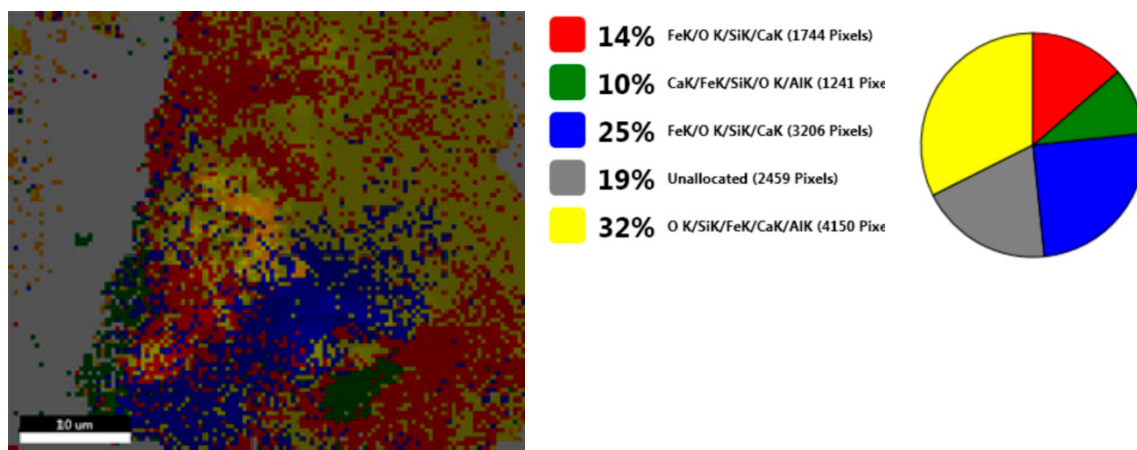

**Figure S4B(1)**

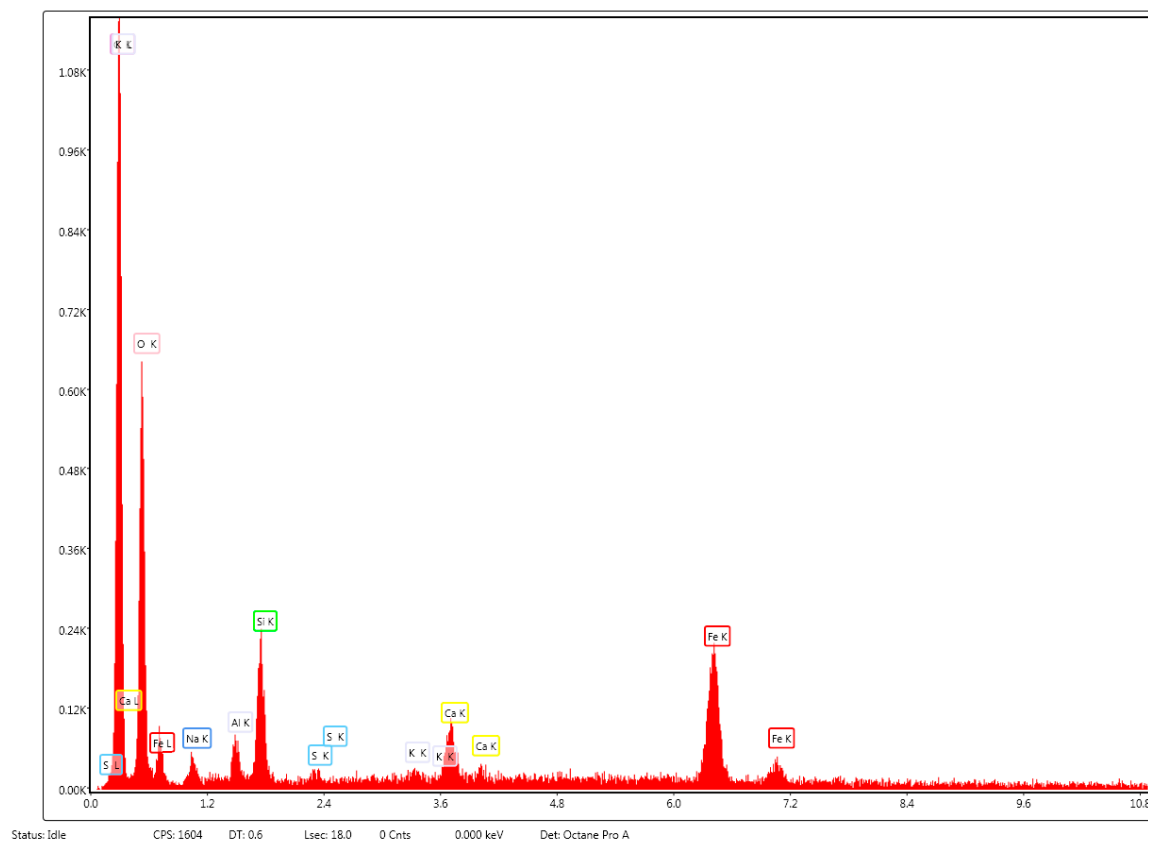

**Figure S4B(2)**

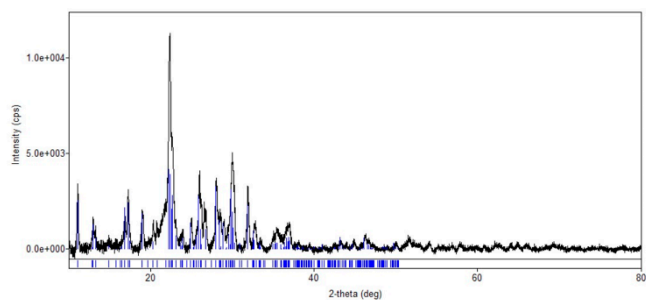**A**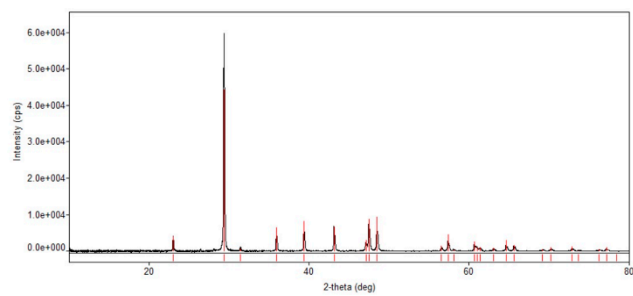**B**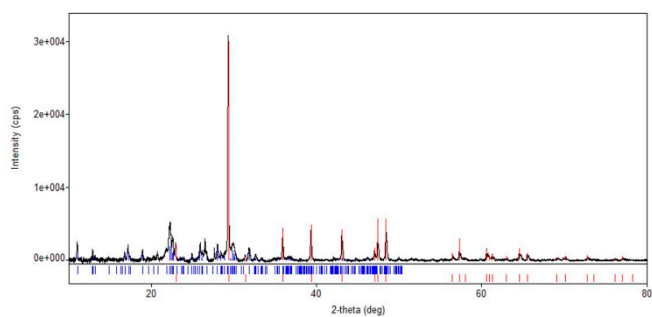**C**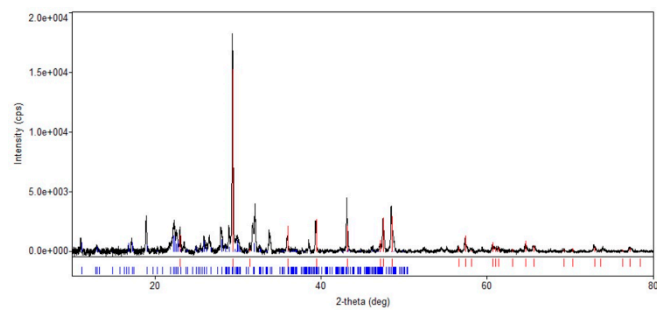**D****Figure S5**

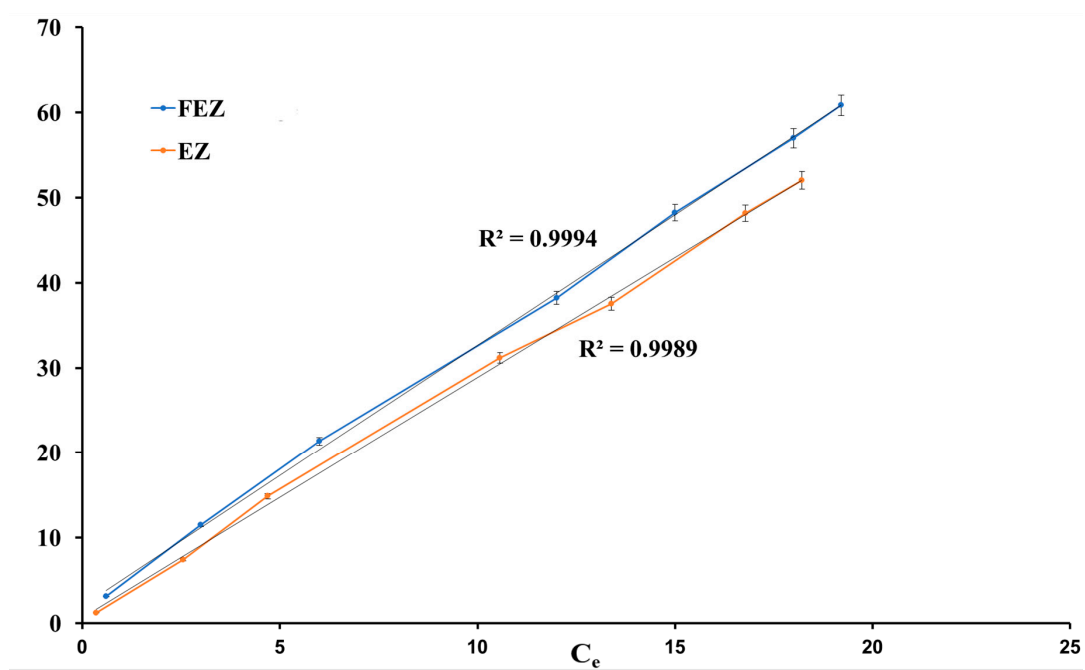

A

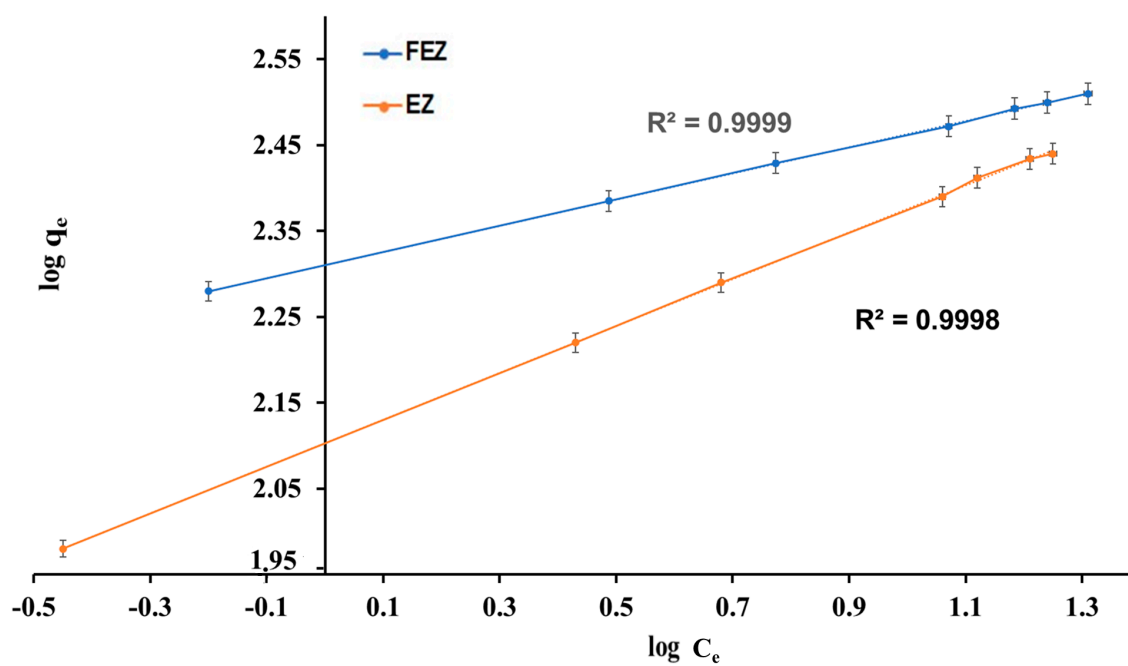

B

Figure S6

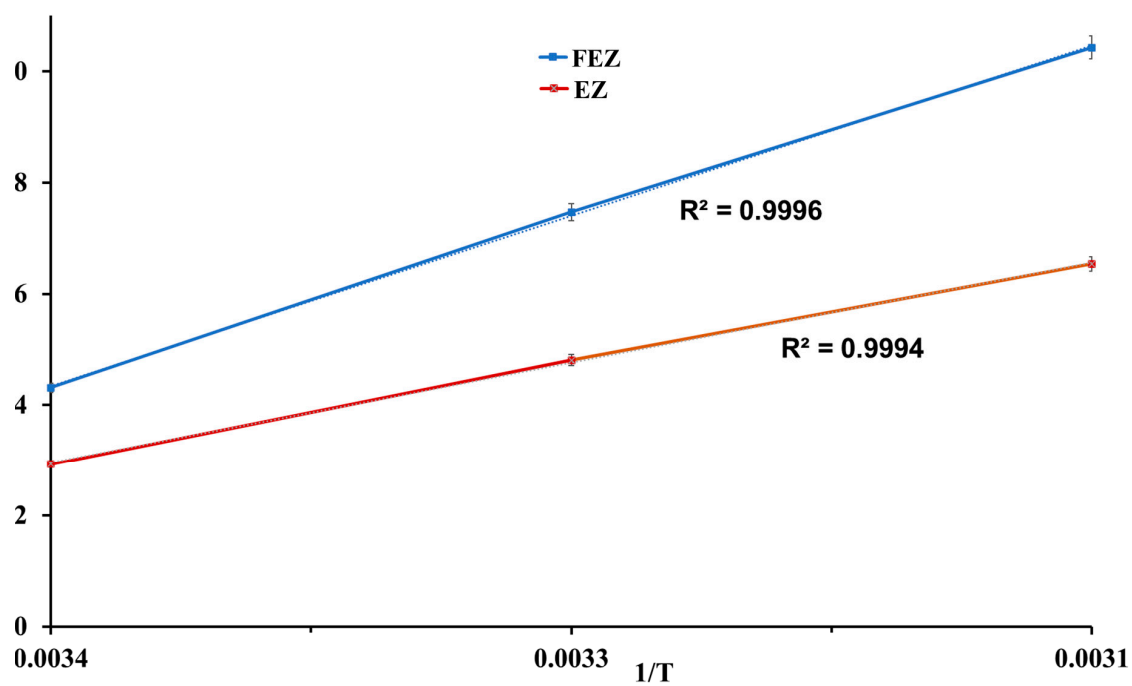**Figure S7**

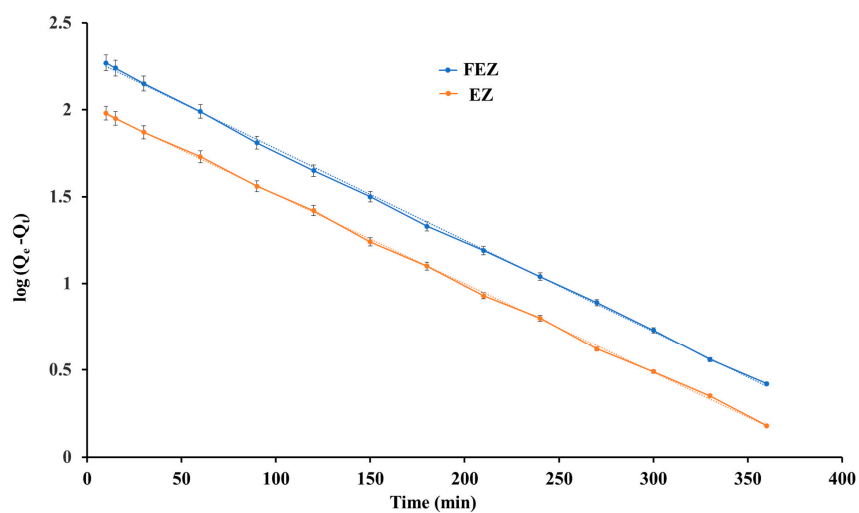**A**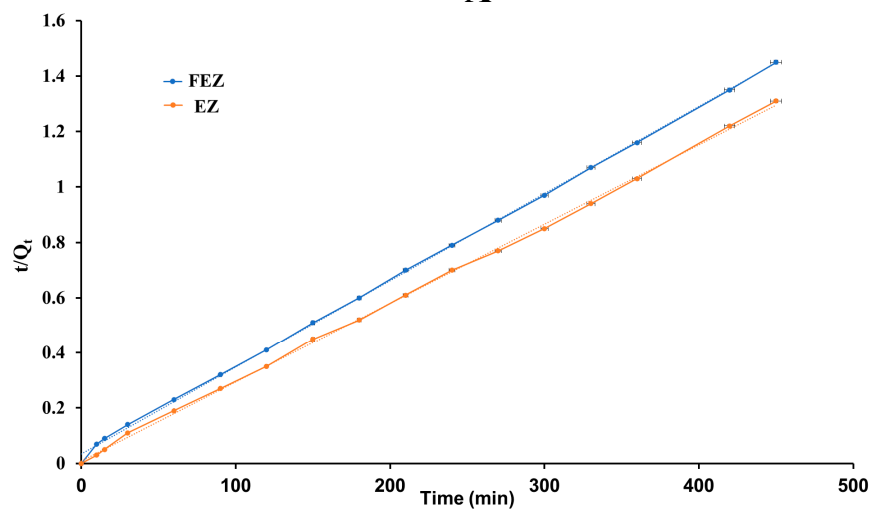**B**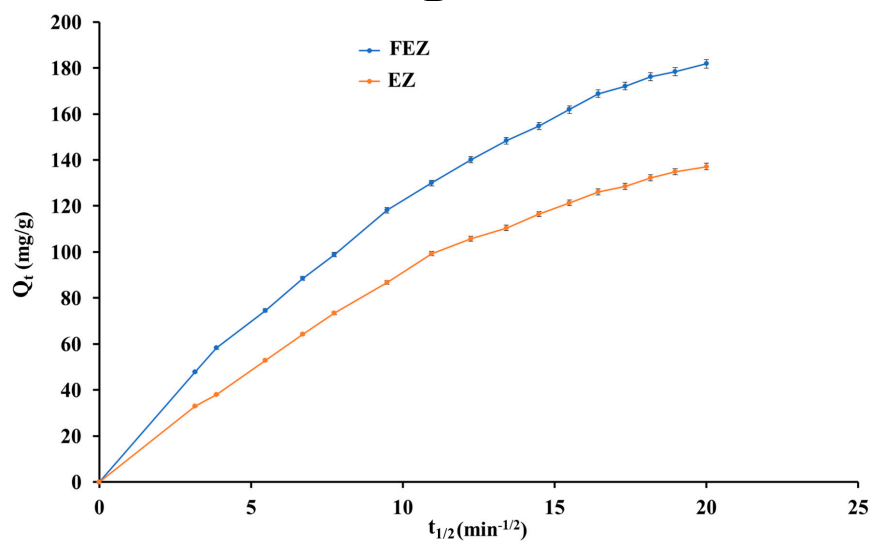**C****Figure S8**



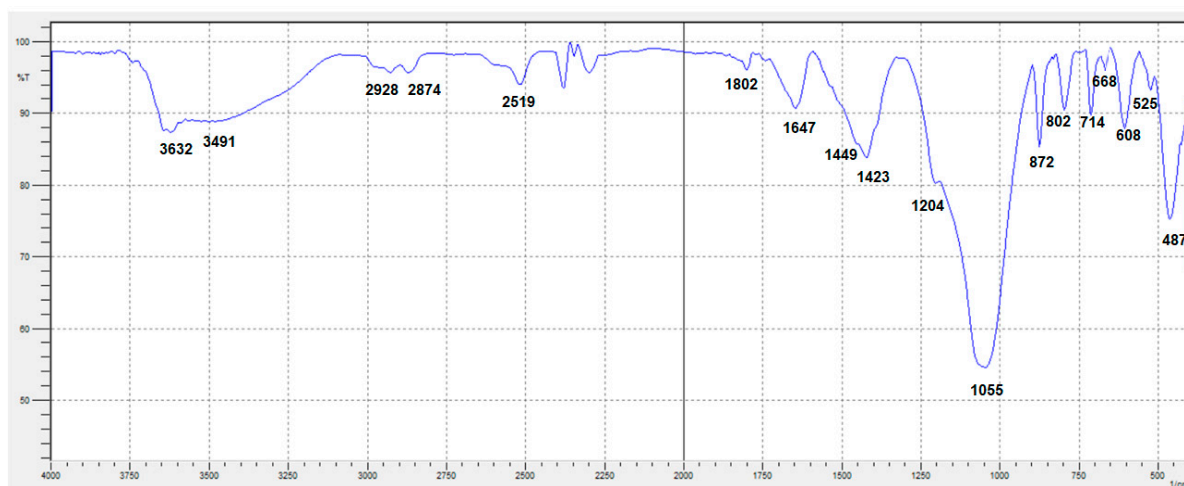**Figure S9A**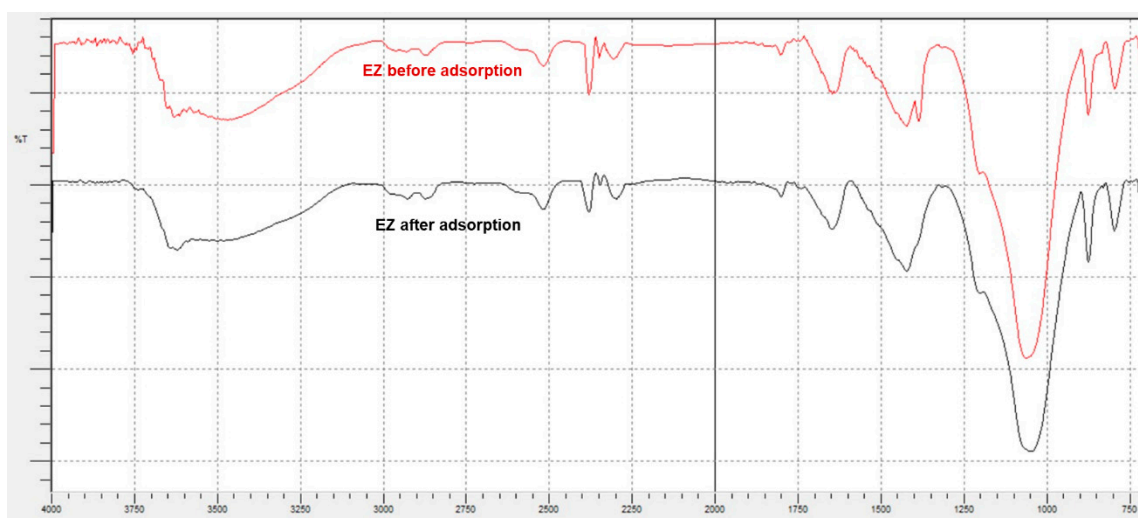**Figure S9B**

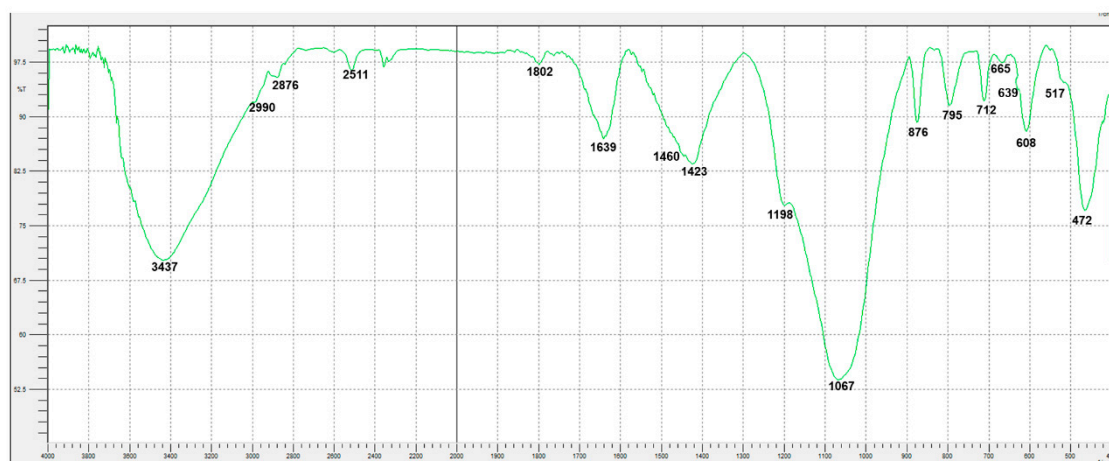

**Figure S10A**

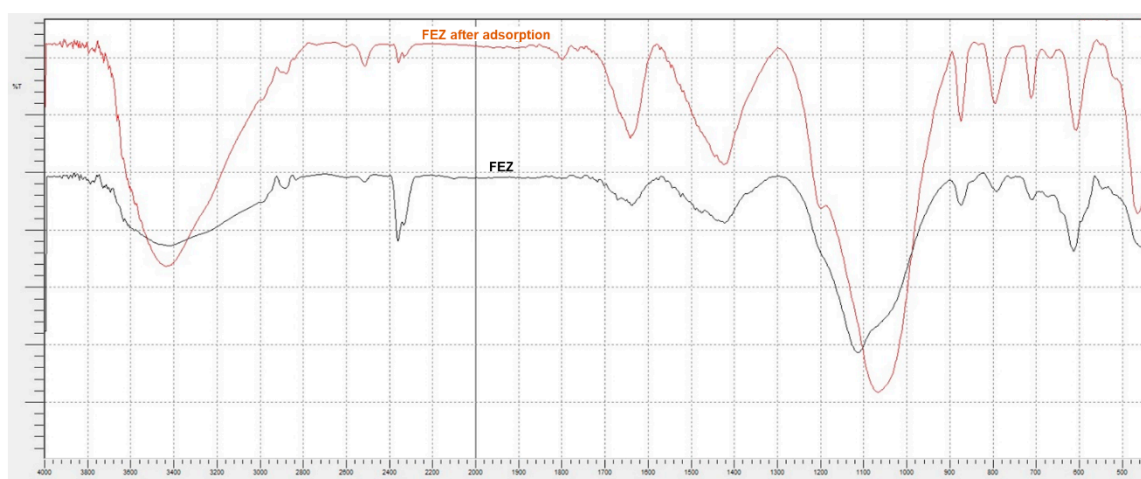

**Figure S10B**

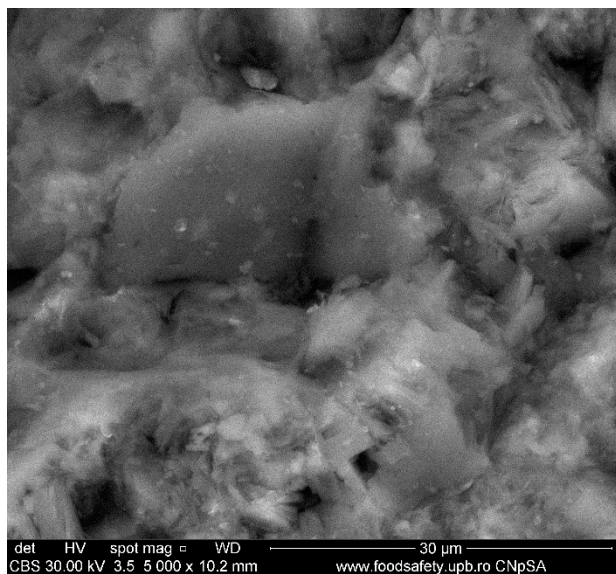**A**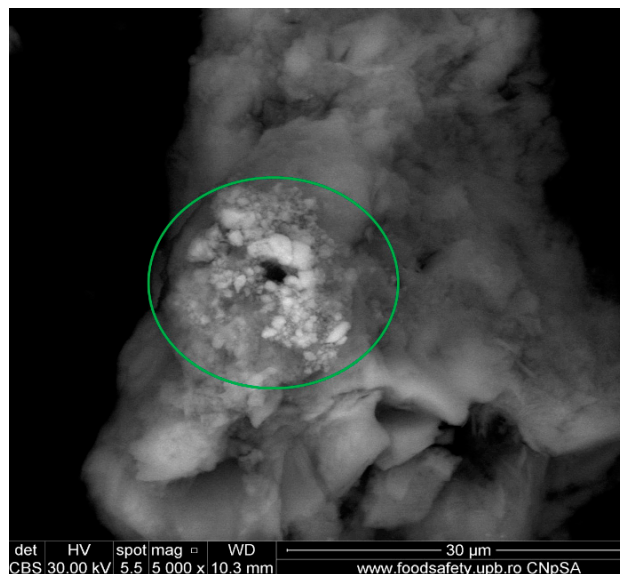**B**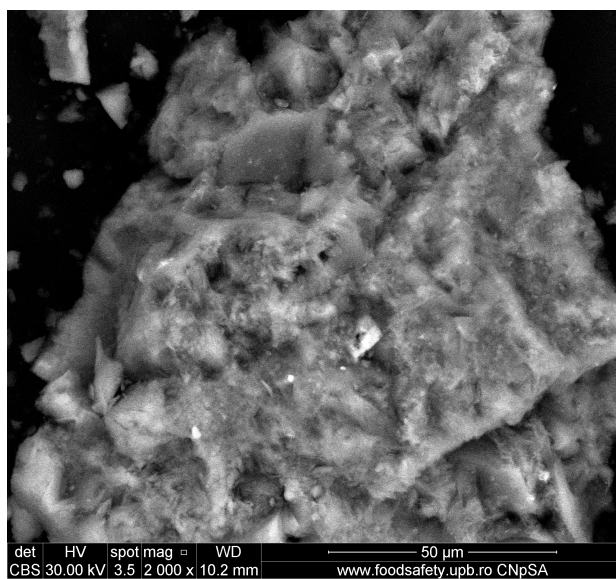**C**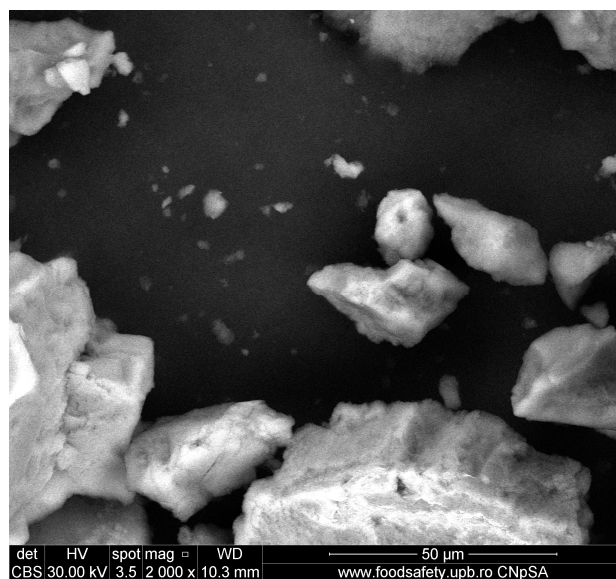**D****Figure S11**

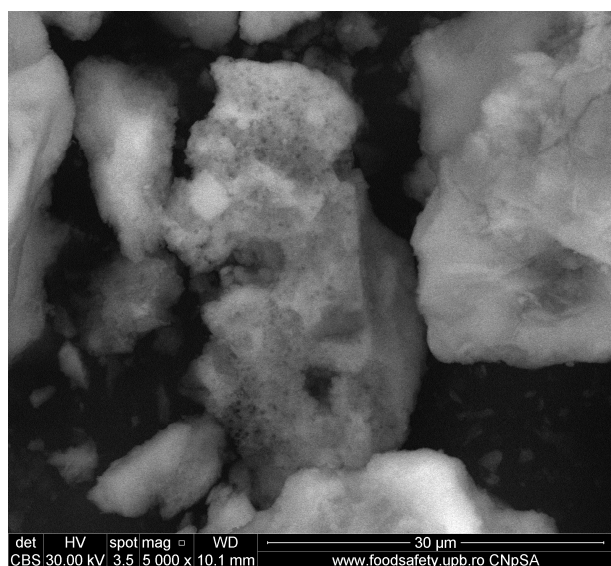**A**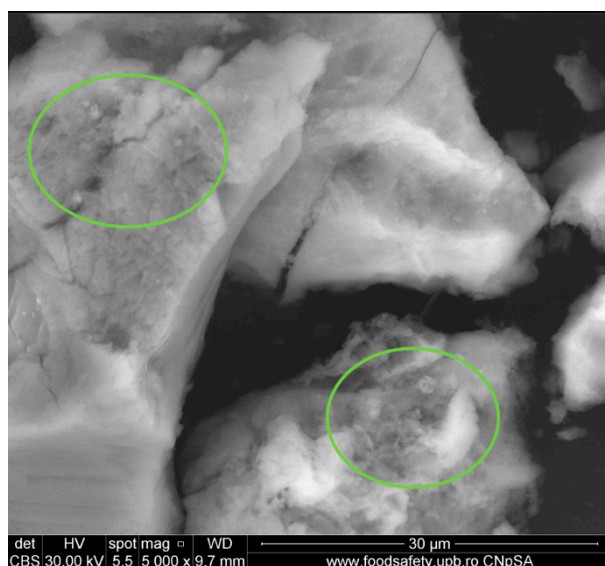**B**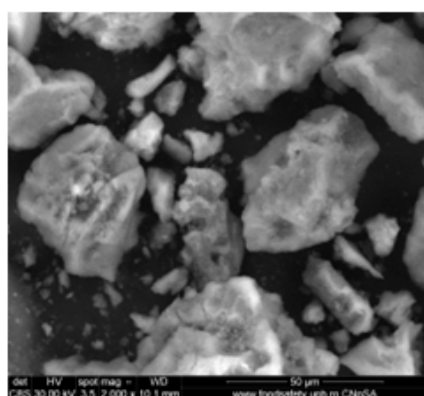**C**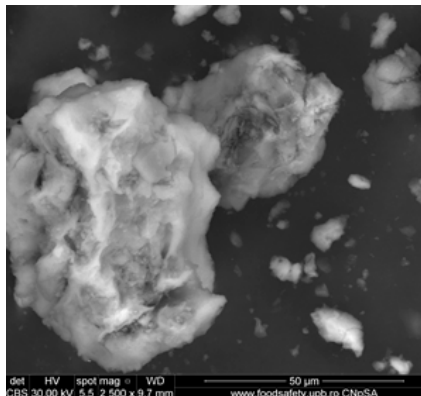**D**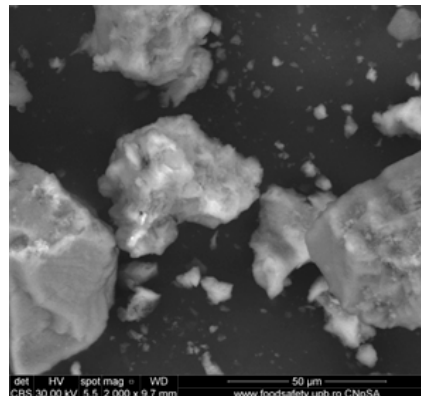**E****Figure S12**



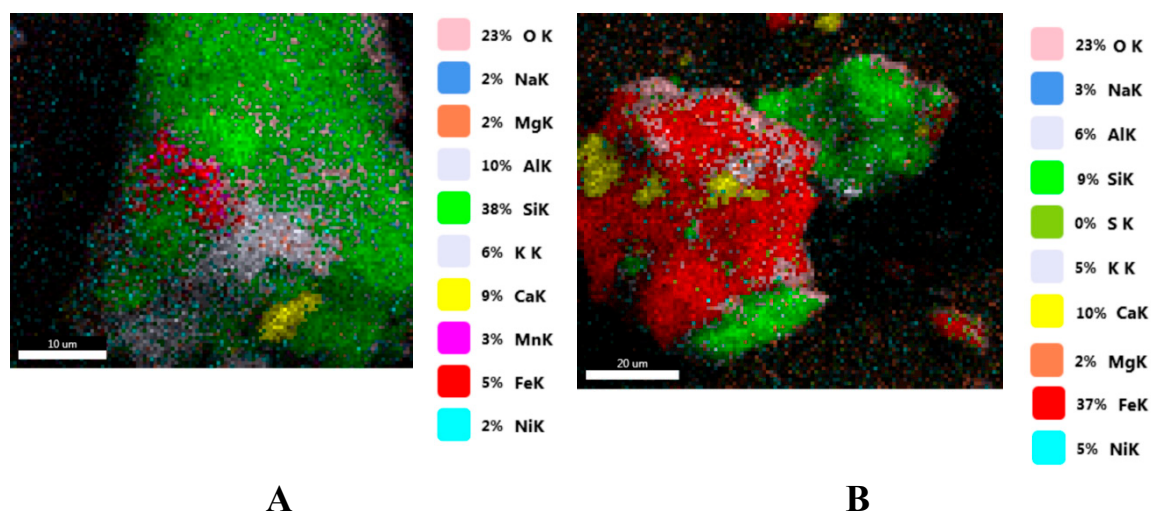**Figure S13**

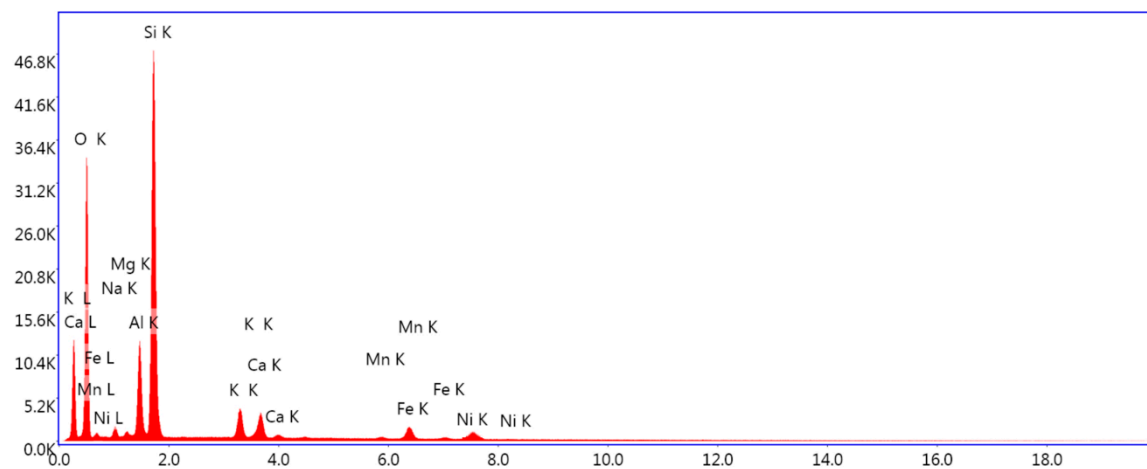**Figure S14A**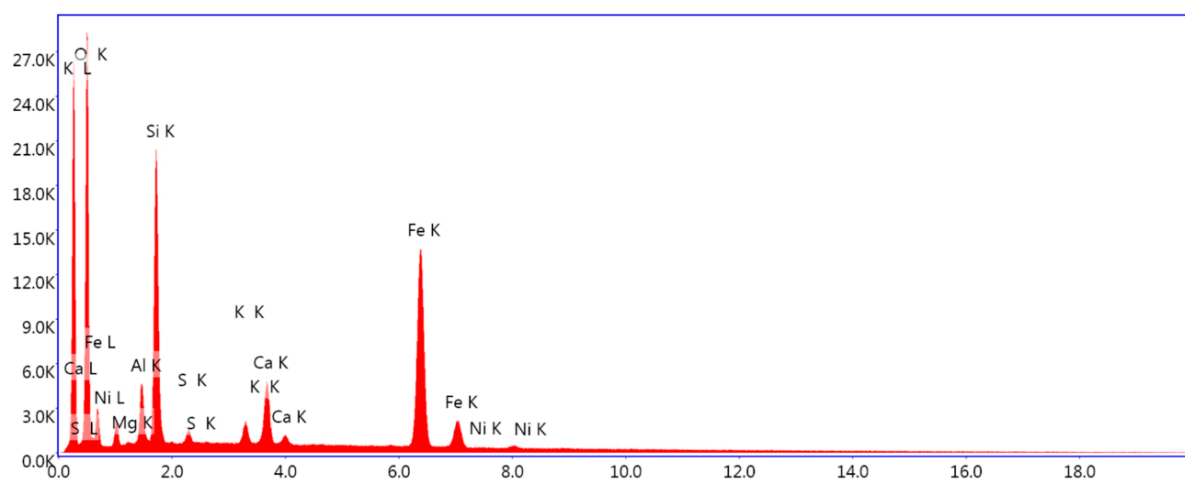**Figure S14B**
